# Supplementary material for: Improving cardiovascular risk stratification through multivariate time-series analysis of cardiopulmonary exercise test data
Source: PubMed Central journal article supplement (PMC11403400; doi:10.1016/j.isci.2024.110792), 2024-08-22

**Supplemental information**

**Improving cardiovascular risk stratification  
through multivariate time-series analysis  
of cardiopulmonary exercise test data**

**Evangelos Ntalianis, Nicholas Cauwenberghs, František Sabovčík, Everton Santana, Francois Haddad, Jomme Claes, Matthijs Michielsen, Guido Claessen, Werner Budts, Kaatje Goetschalckx, Véronique Cornelissen, and Tatiana Kuznetsova**

## SUPPLEMENTAL INFORMATION

**Supplemental Table S1: Clinical characteristics of the 1399 participants by sex in the training sample (iCOMPEER)**

|                                         | Men<br>(n=871)   | Women<br>(n=528) | P Value |
|-----------------------------------------|------------------|------------------|---------|
| <b>Anthropometrics</b>                  |                  |                  |         |
| Age, y                                  | 58.79 ± 11.83    | 52.42 ± 13.54    | <0.0001 |
| Weight, Kg                              | 86.49 ± 16.0     | 74.6 ± 15.7      | <0.0001 |
| Height, cm                              | 175.3 ± 7.14     | 164.05 ± 6.96    | <0.0001 |
| Body mass index, kg/m <sup>2</sup>      | 28.12 ± 4.7      | 27.76 ± 5.79     | <0.0001 |
| <b>Medical history</b>                  |                  |                  |         |
| Hypertension, n(%)                      | 704 (80.83)      | 294 (55.68)      | <0.0001 |
| DM type I or II, n(%)                   | 146 (16.76)      | 46 (8.71)        | <0.0001 |
| Chronic kidney disease, n(%)            | 50 (5.74)        | 23 (4.36)        | 0.0006  |
| Asthma or COPD, n(%)                    | 40 (4.59)        | 26 (4.92)        | 0.98    |
| Cardiovascular disease, n(%)            | 655 (75.2)       | 184 (34.85)      | <0.0001 |
| Cardiovascular intervention, n(%)       | 630 (72.33)      | 156 (29.55)      | <0.0001 |
| <b>Medication</b>                       |                  |                  |         |
| Antihypertensive drugs, n(%)            | 623 (71.53)      | 244 (46.21)      | <0.0001 |
| Lipid lowering drugs, n(%)              | 679 (77.96)      | 207 (39.2)       | <0.0001 |
| Anti-thrombotic drugs, n(%)             | 674 (77.38)      | 201 (38.07)      | <0.0001 |
| Anti-diabetic drugs, n(%)               | 128 (14.7)       | 49 (9.28)        | <0.0001 |
| Beta blockers, n(%)                     | 442 (50.75)      | 190 (35.98)      | <0.0001 |
| CCB, n(%)                               | 154 (17.68)      | 71 (13.45)       | <0.0001 |
| ACE or ARB, n(%)                        | 468 (53.73)      | 151 (28.6)       | <0.0001 |
| Diuretics, n(%)                         | 98 (11.25)       | 62 (11.74)       | 0.056   |
| <b>Spirometry</b>                       |                  |                  |         |
| FEV <sub>1</sub> , L                    | 3.4 ± 0.61       | 2.56 ± 0.45      | <0.0001 |
| FEV <sub>1</sub> %predicted             | 102.45 ± 13.9    | 102.22 ± 13.93   | 0.40    |
| FVC <sub>1</sub> , L                    | 4.39 ± 0.73      | 3.26 ± 0.55      | <0.0001 |
| FVC %predicted                          | 104.5 ± 12.68    | 108.22 ± 14.04   | <0.0001 |
| FEV <sub>1</sub> /FVC (%)               | 98.18 ± 7.85     | 94.71 ± 7.18     | <0.0001 |
| <b>CPET data at rest</b>                |                  |                  |         |
| HR (at rest), beats/min                 | 69.82 ± 12.87    | 77.23 ± 14.57    | <0.0001 |
| SBP (at rest), mm Hg                    | 129.14 ± 19.71   | 121.78 ± 20.57   | <0.0001 |
| DBP (at rest), mm Hg                    | 78.23 ± 11.64    | 76.73 ± 11.38    | 0.001   |
| VO <sub>2</sub> , mL/min                | 575.66 ± 132.1   | 464.69 ± 115.68* | <0.0001 |
| PETO <sub>2</sub> , mm Hg               | 108.03 ± 5.24    | 107.83 ± 5.31    | 0.48    |
| PETCO <sub>2</sub> , mm Hg              | 34.44 ± 3.27     | 34.05 ± 3.31*    | 0.032   |
| RER                                     | 0.84 ± 0.08      | 0.81 ± 0.08*     | <0.0001 |
| <b>CPET data at peak</b>                |                  |                  |         |
| Load, watt                              | 184.95 ± 47.44   | 127.65 ± 36.69   | <0.0001 |
| VO <sub>2</sub> , ml/min                | 2052.79 ± 558.08 | 1402.58 ± 368.76 | <0.0001 |
| VO <sub>2</sub> per kg, ml/kg/min       | 24.12 ± 6.68     | 19.29 ± 5.44     | <0.0001 |
| VO <sub>2</sub> percentage predicted, % | 88.97 ± 19.19    | 86.11 ± 17.23    | 0.017   |
| HR, bpm                                 | 142.93 ± 23.25   | 148.05 ± 25.54   | <0.0001 |
| HR percentage predicted, %              | 88.59 ± 12.4     | 88.15 ± 12.37    | 0.513   |
| O <sub>2</sub> pulse, ml/beat           | 14.38 ± 3.1      | 9.53 ± 2.05      | <0.0001 |

---

|                                       |                |                |         |
|---------------------------------------|----------------|----------------|---------|
| O <sub>2</sub> pulse/kg, ml/beat/kg   | 0.17 ± 0.03    | 0.13 ± 0.03    | <0.0001 |
| SBP, mm Hg                            | 183.86 ± 28.18 | 163.11 ± 28.35 | <0.0001 |
| VE, L/min                             | 81.13 ± 22.51  | 53.2 ± 13.78   | <0.0001 |
| VE/ $\dot{V}CO_2$ slope               | 29.02 ± 4.33   | 28.59 ± 4.46   | 0.0059  |
| PET <sub>O<sub>2</sub></sub> , mm Hg  | 115.42 ± 4.95  | 115.01 ± 4.68  | 0.12    |
| PET <sub>CO<sub>2</sub></sub> , mm Hg | 37.63 ± 4.21   | 37.64 ± 4.12   | 0.97    |
| RER                                   | 1.18 ± 0.08    | 1.16 ± 0.09    | <0.0001 |
| Borg score                            | 15.85 ± 1.56   | 16.03 ± 1.68   | 0.148   |

---

Data are presented as mean ± SD or number of subjects (%). BMI, body mass index; CPET, cardiopulmonary exercise testing; DM, Diabetes mellitus; COPD, chronic obstructive pulmonary disease; CCB, Calcium channel blocker; ACE, angiotensin-converting enzyme inhibitors; ARB, angiotensin receptor blocker; HR, heart rate; SBP, systolic blood pressure; DBP, diastolic blood pressure; CV, cardiovascular; FEV1, forced expiratory volume in 1 s; FVC, forced vital capacity; HR, heart rate; RER, respiratory exchange ratio; SBP, systolic blood pressure;  $\dot{V}CO_2$ , rate of carbon dioxide produced; VE, minute ventilation; VE/ $\dot{V}CO_2$  slope, ventilatory efficiency;  $\dot{V}O_2$ , rate of oxygen uptake.

---

**Supplemental Table S2: Clinical characteristics of men in the training cohort (iCOMPEER) per cluster.**

|                                    | Cluster 1<br>(n=81) | Cluster 2<br>(n=149) | Cluster 3<br>(n=207) | Cluster 4<br>(n=252) | Cluster 5<br>(n=182) |
|------------------------------------|---------------------|----------------------|----------------------|----------------------|----------------------|
| <b>Anthropometrics</b>             |                     |                      |                      |                      |                      |
| Age, y                             | 45.79 ± 10.59       | 52.04 ± 11.62*       | 58.25 ± 9.75*†       | 62.14 ± 9.96*†‡      | 66.1 ± 9.06*†‡&      |
| Weight, kg                         | 96.6 ± 22.88        | 91.55 ± 16.64        | 87.88 ± 13.82*†      | 84.33 ± 12.98*†‡     | 79.27 ± 13.67*†‡&    |
| Height, cm                         | 182.3 ± 6.36        | 178.3 ± 6.86*        | 175.89 ± 6.27*†      | 173.65 ± 6.27*†‡     | 171.35 ± 6.28*†‡&    |
| Body mass index, kg/m <sup>2</sup> | 29.03 ± 6.51        | 28.8 ± 4.93          | 28.42 ± 4.36         | 27.98 ± 4.19         | 26.98 ± 4.33*†‡&     |
| <b>Medical history</b>             |                     |                      |                      |                      |                      |
| Hypertension, n(%)                 | 46 (56.79)          | 109 (73.15)*         | 168 (81.16)*         | 211 (83.73)*†        | 170 (93.41)*†‡&      |
| DM type I or II, n(%)              | 4 (4.94)            | 20 (13.42)*          | 28 (13.53)*          | 44 (17.46)*          | 50 (27.47)*†‡&       |
| Chronic kidney disease, n(%)       | 0 (0.0)             | 2 (1.34)             | 8 (3.86)             | 16 (6.35)*†          | 24 (13.19)*†‡&       |
| Asthma or COPD, n(%)               | 5 (6.17)            | 3 (2.01)             | 4 (1.93)             | 14 (5.56)‡           | 14 (7.69) ‡          |
| Cardiovascular disease, n(%)       | 35 (43.21)          | 100 (67.11)*         | 148 (71.5)*          | 212 (84.13)*†‡       | 160 (87.91)*†‡       |
| Cardiovascular intervention, n(%)  | 32 (39.51)          | 96 (64.43)*          | 144 (69.57)*         | 202 (80.16)*†‡       | 156 (85.71)*†‡       |
| <b>Medication</b>                  |                     |                      |                      |                      |                      |
| Antihypertensive drugs, n(%)       | 30 (37.04)          | 88 (59.06)*          | 148 (71.5)*†         | 199 (78.97)*†        | 158 (86.81)*†‡&      |
| Lipid lowering drugs, n(%)         | 36 (44.44)          | 96 (64.43)*          | 163 (78.74)*†        | 220 (87.3)*†‡        | 164 (90.11)*†‡       |
| Anti-thrombotic drugs, n(%)        | 35 (43.21)          | 106 (71.14)*         | 154 (74.4)*          | 216 (85.71)*†‡       | 163 (89.56)*†‡       |
| Anti-diabetic drugs, n(%)          | 4 (4.94)            | 20 (13.42)*          | 23 (11.11)           | 36 (14.29)*          | 45 (24.73)*†‡&       |
| Beta blockers, n(%)                | 14 (17.28)          | 61 (40.94)*          | 96 (46.38)*          | 150 (59.52)*†‡       | 121 (66.48)*†‡       |
| CCB, n(%)                          | 4 (4.94)            | 19 (12.75)           | 46 (22.22)*†         | 40 (15.87)*          | 45 (24.73)*†&        |
| ACE or ARB, n(%)                   | 26 (32.1)           | 61 (40.94)           | 106 (51.21)*         | 153 (60.71)*†‡       | 122 (67.03)*†‡       |
| Diuretics, n(%)                    | 2 (2.47)            | 16 (10.74)*          | 20 (9.66)*           | 29 (11.51)*          | 31 (17.03)*‡         |
| <b>Spirometry</b>                  |                     |                      |                      |                      |                      |
| FEV <sub>1</sub> , L               | 4.17 ± 0.52         | 3.82 ± 0.5*          | 3.44 ± 0.48*†        | 3.26 ± 0.54*†‡       | 2.84 ± 0.52*†‡&      |
| FEV <sub>1</sub> %predicted        | 104.7 ± 10.46       | 106.26 ± 11.39       | 103.27 ± 12.63†      | 102.81 ± 15.1†       | 96.79 ± 15.54*†‡&    |
| FVC <sub>1</sub> , L               | 5.29 ± 0.58         | 4.87 ± 0.61*         | 4.43 ± 0.61*†        | 4.26 ± 0.64*†‡       | 3.74 ± 0.63*†‡&      |
| FVC %predicted                     | 107.41 ± 8.38       | 108.07 ± 11.66       | 104.74 ± 12.07†      | 105.29 ± 13.21†      | 98.83 ± 13.7*†‡&     |
| FEV <sub>1</sub> /FVC (%)          | 97.51 ± 6.56        | 98.55 ± 5.51         | 98.82 ± 7.02         | 97.72 ± 8.63         | 98.07 ± 9.55         |
| <b>CPET data at rest</b>           |                     |                      |                      |                      |                      |
| HR (at rest), beats/min            | 71.4 ± 13.35        | 69.18 ± 12.38        | 70.43 ± 12.07        | 68.99 ± 12.46        | 70.09 ± 14.3         |

|                                         |                  |                   |                   |                     |                      |
|-----------------------------------------|------------------|-------------------|-------------------|---------------------|----------------------|
| SBP (at rest), mm Hg                    | 122.07 ± 18.5    | 126.45 ± 18.89    | 130.27 ± 19.87*   | 130.92 ± 19.1*†     | 130.73 ± 20.58*      |
| DBP (at rest), mm Hg                    | 79.52 ± 11.63    | 79.35 ± 10.94     | 80.29 ± 11.16     | 77.46 ± 11.24‡      | 75.45 ± 12.61*†‡     |
| VO <sub>2</sub> , mL/min                | 722.65 ± 131.22  | 635.73 ± 111.6*   | 602.15 ± 108.8*†  | 552.43 ± 103.21*†‡  | 463.09 ± 103.21*†‡&  |
| PETO <sub>2</sub> , mm Hg               | 105.86 ± 4.82    | 106.79 ± 5.31     | 107.34 ± 5.12*    | 108.25 ± 4.85*†     | 110.51 ± 5.08*†‡&    |
| PETCO <sub>2</sub> , mm Hg              | 35.92 ± 2.69     | 35.55 ± 3.03      | 34.78 ± 3.07*†    | 34.2 ± 3.15*†‡      | 32.85 ± 3.37*†‡&     |
| RER                                     | 0.82 ± 0.09      | 0.83 ± 0.08       | 0.84 ± 0.09       | 0.84 ± 0.08         | 0.86 ± 0.08*†‡&      |
| <b>CPET data at peak</b>                |                  |                   |                   |                     |                      |
| Load, watt                              | 273.27 ± 34.71   | 224.93 ± 25.05*   | 192.78 ± 19.86*†  | 164.96 ± 19.32*†‡   | 131.7 ± 22.75*†‡&    |
| VO <sub>2</sub> , ml/min                | 3192.86 ± 285.15 | 2564.76 ± 184.18* | 2142.6 ± 116.59*† | 1804.13 ± 118.46*†‡ | 1368.43 ± 188.41*†‡& |
| VO <sub>2</sub> per kg, ml/kg/min       | 34.7 ± 8.0       | 28.79 ± 4.86*     | 24.96 ± 3.99*†    | 21.89 ± 3.6*†‡      | 17.71 ± 3.69*†‡&     |
| VO <sub>2</sub> percentage predicted, % | 116.22 ± 15.21   | 102.34 ± 15.16*   | 92.56 ± 12.01*†   | 83.83 ± 12.7*†‡     | 68.95 ± 12.5*†‡&     |
| HR, bpm                                 | 170.79 ± 15.33   | 156.34 ± 18.0*    | 146.11 ± 17.97*†  | 136.19 ± 20.32*†‡   | 125.28 ± 19.98*†‡&   |
| HR percentage predicted, %              | 98.07 ± 7.09     | 93.14 ± 9.26*     | 90.5 ± 11.19*†    | 86.42 ± 12.72*†‡    | 81.48 ± 12.6*†‡&     |
| O <sub>2</sub> pulse, ml/beat           | 18.8 ± 2.04      | 16.63 ± 2.27*     | 14.88 ± 2.0*†     | 13.55 ± 2.21*†‡     | 11.14 ± 2.04*†‡&     |
| O <sub>2</sub> pulse/kg, ml/beat/kg     | 0.2 ± 0.04       | 0.19 ± 0.03*      | 0.17 ± 0.03*†     | 0.16 ± 0.03*†‡      | 0.14 ± 0.03*†‡&      |
| SBP, mm Hg                              | 192.73 ± 29.66   | 190.26 ± 28.43    | 187.18 ± 27.4     | 182.0 ± 25.5*†‡     | 173.46 ± 28.27*†‡&   |
| VE, L/min                               | 115.54 ± 20.61   | 97.57 ± 16.66*    | 84.72 ± 15.33*†   | 73.04 ± 12.75*†‡    | 59.46 ± 13.91*†‡&    |
| VE/VCO <sub>2</sub> slope               | 26.11 ± 2.93     | 27.5 ± 3.59*      | 28.59 ± 3.68*†    | 29.5 ± 4.21*†‡      | 31.39 ± 4.86*†‡&     |
| PETO <sub>2</sub> , mm Hg               | 113.83 ± 4.7     | 114.93 ± 4.48     | 115.29 ± 4.96*    | 115.5 ± 5.16*       | 116.57 ± 4.85*†‡&    |
| PETCO <sub>2</sub> , mm Hg              | 39.64 ± 3.87     | 38.87 ± 4.04      | 37.89 ± 4.11*†    | 37.27 ± 4.03*†      | 35.94 ± 4.09*†‡&     |
| RER                                     | 1.15 ± 0.07      | 1.17 ± 0.07*      | 1.17 ± 0.08*      | 1.18 ± 0.08*        | 1.2 ± 0.1*†‡         |
| Borg score                              | 16.62 ± 1.32     | 16.15 ± 1.48*     | 15.84 ± 1.47*     | 15.81 ± 1.51*†      | 15.34 ± 1.69*†‡&     |

Data are presented as mean ± SD or number of subjects (%). Significance for between-phenogroups differences: \*P<0.05 vs Cluster 1; †P<0.05 vs Cluster 2; ‡P<0.05 vs Cluster 3; &P<0.05 vs Cluster 4. BMI, body mass index; CPET, cardiopulmonary exercise testing; DM, Diabetes mellitus; COPD, chronic obstructive pulmonary disease; CCB, Calcium channel blocker; ACE, angiotensin-converting enzyme inhibitors; ARB, angiotensin receptor blocker; HR, heart rate; SBP, systolic blood pressure; DBP, diastolic blood pressure; CV, cardiovascular; FEV1, forced expiratory volume in 1 s; FVC, forced vital capacity; HR, heart rate; PETO<sub>2</sub>, end-tidal partial pressure of oxygen; PETCO<sub>2</sub>, end-tidal partial pressure of carbon dioxide; RER, respiratory exchange ratio; SBP, systolic blood pressure; VCO<sub>2</sub>, rate of carbon dioxide produced; VE, minute ventilation; VE/VCO<sub>2</sub> slope, ventilatory efficiency; VO<sub>2</sub>, rate of oxygen uptake.

**Supplemental Table S3: Clinical characteristics of women in the training cohort (iCOMPEER) per cluster.**

|                                    | Cluster 1<br>(n=40) | Cluster 2<br>(n=89) | Cluster 3<br>(n=158) | Cluster 4<br>(n=144) | Cluster 5<br>(n=97) |
|------------------------------------|---------------------|---------------------|----------------------|----------------------|---------------------|
| <b>Anthropometrics</b>             |                     |                     |                      |                      |                     |
| Age, y                             | 37.94 ± 11.03       | 45.34 ± 10.73*      | 49.95 ± 12.17*†      | 56.48 ± 11.71*†‡     | 62.89 ± 10.98*†‡&   |
| Weight, kg                         | 85.03 ± 17.39       | 81.46 ± 16.36       | 75.09 ± 16.5*†       | 71.43 ± 12.54*†‡     | 67.92 ± 12.14*†‡&   |
| Height, cm                         | 170.65 ± 6.78       | 168.37 ± 6.56       | 164.1 ± 5.76*†       | 161.93 ± 6.13*†‡     | 160.42 ± 6.37*†‡    |
| Body mass index, kg/m <sup>2</sup> | 29.29 ± 6.1         | 28.91 ± 6.51        | 27.97 ± 6.35         | 27.26 ± 4.68*†       | 26.49 ± 5.05*†      |
| <b>Medical history</b>             |                     |                     |                      |                      |                     |
| Hypertension, n(%)                 | 7 (17.5)            | 35 (39.33)*         | 79 (50.0)*           | 90 (62.5)*†‡         | 83 (85.57)*†‡&      |
| DM type I or II, n(%)              | 3 (7.5)             | 2 (2.25)            | 13 (8.23)            | 13 (9.03)†           | 15 (15.46)†         |
| Chronic kidney disease, n(%)       | 0 (0.0)             | 0 (0.0)             | 7 (4.43)†            | 6 (4.17)             | 10 (10.31)*†        |
| Asthma or COPD, n(%)               | 0 (0.0)             | 2 (2.25)            | 8 (5.06)             | 12 (8.33)            | 4 (4.12)            |
| Cardiovascular disease, n(%)       | 2 (5.0)             | 12 (13.48)          | 43 (27.22)*†         | 61 (42.36)*†‡        | 66 (68.04)*†‡&      |
| Cardiovascular intervention, n(%)  | 0 (0.0)             | 7 (7.87)            | 36 (22.78)*†         | 53 (36.81)*†‡        | 60 (61.86)*†‡&      |
| <b>Medication</b>                  |                     |                     |                      |                      |                     |
| Antihypertensive drugs, n(%)       | 4 (10.0)            | 26 (29.21)*         | 64 (40.51)*          | 76 (52.78)*†‡        | 74 (76.29)*†‡&      |
| Lipid lowering drugs, n(%)         | 0 (0.0)             | 14 (15.73)*         | 51 (32.28)*†         | 76 (52.78)*†‡        | 66 (68.04)*†‡&      |
| Anti-thrombotic drugs, n(%)        | 1 (2.5)             | 13 (14.61)*         | 48 (30.38)*†         | 74 (51.39)*†‡        | 65 (67.01)*†‡&      |
| Anti-diabetic drugs, n(%)          | 3 (7.5)             | 4 (4.49)            | 15 (9.49)            | 14 (9.72)            | 13 (13.4)†          |
| Beta blockers, n(%)                | 2 (5.0)             | 13 (14.61)          | 49 (31.01)*†         | 63 (43.75)*†‡        | 63 (64.95)*†‡&      |
| CCB, n(%)                          | 1 (2.5)             | 4 (4.49)            | 20 (12.66)†          | 23 (15.97)*†         | 23 (23.71)*†‡       |
| ACE or ARB, n(%)                   | 2 (5.0)             | 16 (17.98)*         | 34 (21.52)*          | 47 (32.64)*†‡        | 52 (53.61)*†‡&      |
| Diuretics, n(%)                    | 1 (2.5)             | 10 (11.24)          | 15 (9.49)            | 19 (13.19)           | 17 (17.53)*         |
| <b>Spirometry</b>                  |                     |                     |                      |                      |                     |
| FEV <sub>1</sub> , L               | 3.17 ± 0.37         | 2.87 ± 0.39*        | 2.61 ± 0.39*†        | 2.44 ± 0.38*†‡       | 2.07 ± 0.33*†‡&     |
| FEV <sub>1</sub> %predicted        | 102.14 ± 8.45       | 99.57 ± 11.92       | 101.68 ± 13.35       | 104.5 ± 14.31†       | 101.91 ± 17.11      |
| FVC <sub>1</sub> , L               | 3.9 ± 0.53          | 3.57 ± 0.47*        | 3.31 ± 0.53*†        | 3.14 ± 0.51*†‡       | 2.76 ± 0.36*†‡&     |
| FVC %predicted                     | 106.84 ± 9.53       | 104.78 ± 10.97      | 107.35 ± 14.27       | 110.59 ± 14.93†      | 109.73 ± 15.7†      |
| FEV <sub>1</sub> /FVC (%)          | 96.04 ± 6.81        | 95.01 ± 5.59        | 95.14 ± 6.73         | 94.84 ± 6.81         | 92.82 ± 9.36†       |
| <b>CPET data at rest</b>           |                     |                     |                      |                      |                     |
| HR (at rest), beats/min            | 77.75 ± 16.59       | 80.15 ± 14.01       | 78.41 ± 14.38        | 76.15 ± 13.69†       | 74.02 ± 14.98†‡     |

|                                         |                 |                   |                       |                    |                     |
|-----------------------------------------|-----------------|-------------------|-----------------------|--------------------|---------------------|
| SBP (at rest), mm Hg                    | 111.02 ± 14.54  | 116.02 ± 17.81    | 119.9 ± 18.64*        | 124.01 ± 20.08*†   | 131.25 ± 24.09*†‡&  |
| DBP (at rest), mm Hg                    | 74.3 ± 10.79    | 77.8 ± 11.24      | 76.01 ± 11.06         | 77.62 ± 10.52      | 76.6 ± 13.1         |
| VO <sub>2</sub> , mL/min                | 591.48 ± 110.03 | 549.66 ± 123.1    | 475.32 ± 91.67*†      | 426.2 ± 82.73*†‡   | 374.28 ± 79.29*†‡&  |
| PETO <sub>2</sub> , mm Hg               | 106.4 ± 4.93    | 107.6 ± 5.12      | 107.25 ± 4.97         | 107.79 ± 5.54      | 109.64 ± 5.37*†‡&   |
| PETCO <sub>2</sub> , mm Hg              | 34.7 ± 2.8      | 34.31 ± 3.04      | 34.3 ± 3.22           | 34.16 ± 3.21       | 33.0 ± 3.77*†‡&     |
| RER                                     | 0.79 ± 0.09     | 0.8 ± 0.08        | 0.8 ± 0.07            | 0.81 ± 0.08        | 0.84 ± 0.09*†‡&     |
| <b>CPET data at peak</b>                |                 |                   |                       |                    |                     |
| Load, watt                              | 195.0 ± 20.86   | 160.28 ± 22.16*   | 134.18 ± 20.95*†      | 109.83 ± 16.98*†‡  | 85.77 ± 20.34*†‡&   |
| VO <sub>2</sub> , ml/min                | 2203.7 ± 173.59 | 1770.01 ± 132.92* | 1458.06 ±<br>104.17*† | 1207.46 ± 91.15*†‡ | 934.37 ± 110.37*†‡& |
| VO <sub>2</sub> per kg, ml/kg/min       | 27.05 ± 6.13    | 22.57 ± 4.63*     | 20.35 ± 4.65*†        | 17.4 ± 3.18*†‡     | 14.13 ± 2.66*†‡&    |
| VO <sub>2</sub> percentage predicted, % | 115.41 ± 12.29  | 99.3 ± 10.55*     | 89.22 ± 11.73*†       | 79.4 ± 10.25*†‡    | 66.8 ± 10.13*†‡&    |
| HR, bpm                                 | 173.4 ± 14.47   | 162.63 ± 19.78*   | 152.6 ± 20.22*†       | 142.67 ± 22.99*†‡  | 124.8 ± 24.04*†‡&   |
| HR percentage predicted, %              | 95.31 ± 6.64    | 93.06 ± 9.54      | 89.72 ± 10.01*†       | 87.21 ± 12.45*†    | 79.51 ± 14.66*†‡&   |
| O <sub>2</sub> pulse, ml/beat           | 12.77 ± 1.15    | 11.02 ± 1.4*      | 9.72 ± 1.42*†         | 8.69 ± 1.6*†‡      | 7.76 ± 1.71*†‡&     |
| O <sub>2</sub> pulse/kg, ml/beat/kg     | 0.16 ± 0.03     | 0.14 ± 0.03*      | 0.13 ± 0.03*          | 0.12 ± 0.02*†‡     | 0.12 ± 0.03*†‡&     |
| SBP, mm Hg                              | 156.45 ± 20.62  | 164.74 ± 28.11    | 164.18 ± 29.38        | 163.4 ± 29.69      | 162.2 ± 27.15       |
| VE, L/min                               | 76.39 ± 11.62   | 64.18 ± 9.92*     | 54.64 ± 9.03*†        | 48.48 ± 8.45*†‡    | 38.22 ± 7.46*†‡&    |
| VE/VCO <sub>2</sub> slope               | 26.38 ± 3.71    | 26.85 ± 3.61      | 28.2 ± 4.31*†         | 28.92 ± 4.45*†     | 31.26 ± 4.33*†‡&    |
| PETO <sub>2</sub> , mm Hg               | 113.06 ± 4.91   | 114.68 ± 4.33     | 114.68 ± 4.41*        | 115.83 ± 4.98*†    | 115.42 ± 4.54*      |
| PETCO <sub>2</sub> , mm Hg              | 39.84 ± 3.88    | 38.72 ± 3.76      | 37.85 ± 4.16*         | 37.22 ± 3.94*†     | 36.02 ± 4.0*†‡&     |
| RER                                     | 1.14 ± 0.06     | 1.16 ± 0.07       | 1.16 ± 0.08           | 1.18 ± 0.1*†       | 1.15 ± 0.09&        |
| Borg score                              | 16.48 ± 1.94    | 16.45 ± 1.56      | 16.29 ± 1.57          | 15.77 ± 1.69*†‡    | 15.4 ± 1.56*†‡      |

Data are presented as mean ± SD or number of subjects (%). Significance for between-phenogroups differences: \*P<0.05 vs Cluster 1; †P<0.05 vs Cluster 2; ‡P<0.05 vs Cluster 3; &P<0.05 vs Cluster 4. BMI, body mass index; CPET, cardiopulmonary exercise testing; DM, Diabetes mellitus; COPD, chronic obstructive pulmonary disease; CCB, Calcium channel blocker; ACE, angiotensin-converting enzyme inhibitors; ARB, angiotensin receptor blocker; HR, heart rate; SBP, systolic blood pressure; DBP, diastolic blood pressure; CV, cardiovascular; FEV1, forced expiratory volume in 1 s; FVC, forced vital capacity; HR, heart rate; PETO<sub>2</sub>, end-tidal partial pressure of oxygen; PETCO<sub>2</sub>, end-tidal partial pressure of carbon dioxide; RER, respiratory exchange ratio; SBP, systolic blood pressure; VCO<sub>2</sub>, rate of carbon dioxide produced; VE, minute ventilation; VE/VCO<sub>2</sub> slope, ventilatory efficiency; VO<sub>2</sub>, rate of oxygen uptake.

**Supplemental Table S4: Reasons for CPET referral and the exclusion criteria in the training cohort (iCOMPEER).**

|                             |                                                                                                                                                                                                                                                                                                                                                         |
|-----------------------------|---------------------------------------------------------------------------------------------------------------------------------------------------------------------------------------------------------------------------------------------------------------------------------------------------------------------------------------------------------|
| <b>Reasons for referral</b> | Recent revascularisation including PCI<br>CV risk assessment in hypertension, obesity and/or diabetes mellitus<br>Screening before participating in an exercise programme<br>Differential diagnosis of dyspnoea, chronic fatigue syndrome, other exercise-limiting condition                                                                            |
| <b>Exclusion criteria</b>   | Age < 18 and age > 80<br>Previous myocardial infarction with left ventricular ejection fraction < 50%<br>Symptomatic heart failure, congenital heart disease, cardiomyopathy, cardiac surgery, artificial pacemaker<br>Auto-immune disease, drug abuse, pregnancy<br>Non-compliance to maximal CPET criteria ( $VT_2$ not reached and/or $RER < 1.05$ ) |

**Supplemental Table S5: Formulas used to calculate peak CPET summary metrics**

| Summary CPET metrics at peak           | Formula                                                                                                                                                                                             |
|----------------------------------------|-----------------------------------------------------------------------------------------------------------------------------------------------------------------------------------------------------|
| O <sub>2</sub> pulse (ml/beat)         | $\frac{VO_2(peak)}{HR(peak)}$                                                                                                                                                                       |
| HR percentage predicted                | $100 \times \frac{HR}{220 - age}$                                                                                                                                                                   |
| Predicted VO <sub>2</sub> <sup>1</sup> | men: $-69 + 1.48 \times age + 14.02 \times height + 7.44 \times weight - 0.2256 \times age^2$<br>women: $-588 - 11.33 \times age + 9.13 \times height + 26.88 \times weight - 0.12 \times weight^2$ |
| VO <sub>2</sub> percentage predicted   | $100 \times \frac{VO_2(peak)}{predicted\ VO_2}$                                                                                                                                                     |



**Supplemental Figure S1: Optimal number of clusters based on the selected cluster validity index (CVI). Left panel illustrates the score for each cluster for men and the right panel for women. Red dot in both panels represents the selected value and the respective score**

**Cluster validity index scores to determine optimal number of clusters**

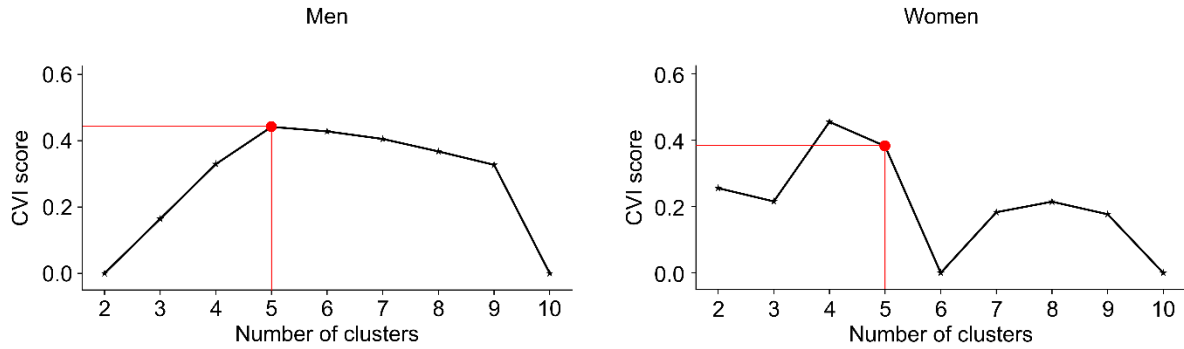

**Supplemental Figure S2: Overview of the computational pipeline. Blue and orange parallelograms illustrate the input data and the results of the processing steps respectively. Green rectangles indicate the processing steps, while the flow of the steps are represented by the black arrows**

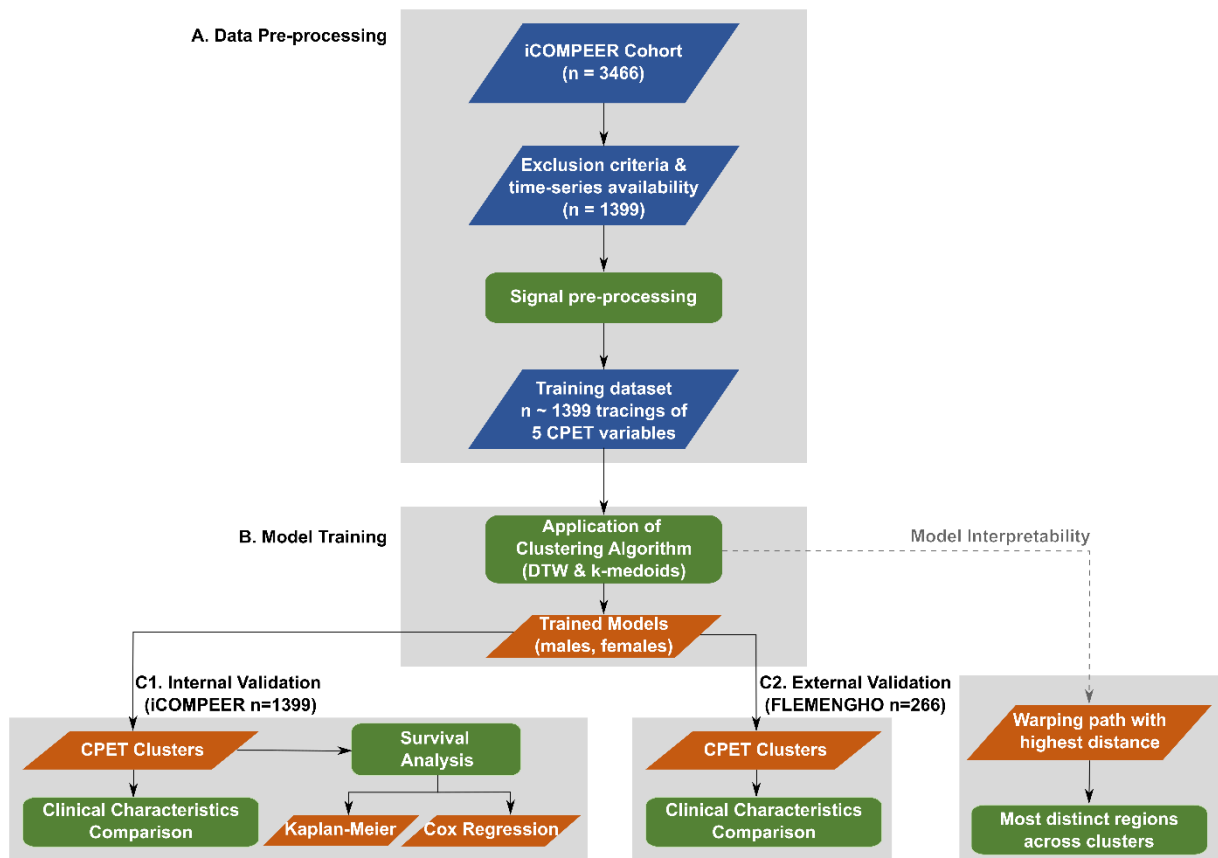

**Supplemental Figure S3: Cross-correlation of time series CPET recordings with respect to all potential lags (temporal shifts). Each row and column corresponds to a specific CPET variable with the main diagonal showing the autocorrelation of the investigated parameters. In each sub-figure the x-axes show the time lag of the time series. We observed a higher correlation between  $\dot{V}O_2$ ,  $\dot{V}CO_2$ ,  $\dot{V}E$  at small time-lags (or at zero time lag) and between RER and  $\dot{V}CO_2$  for zero or small time lags.**

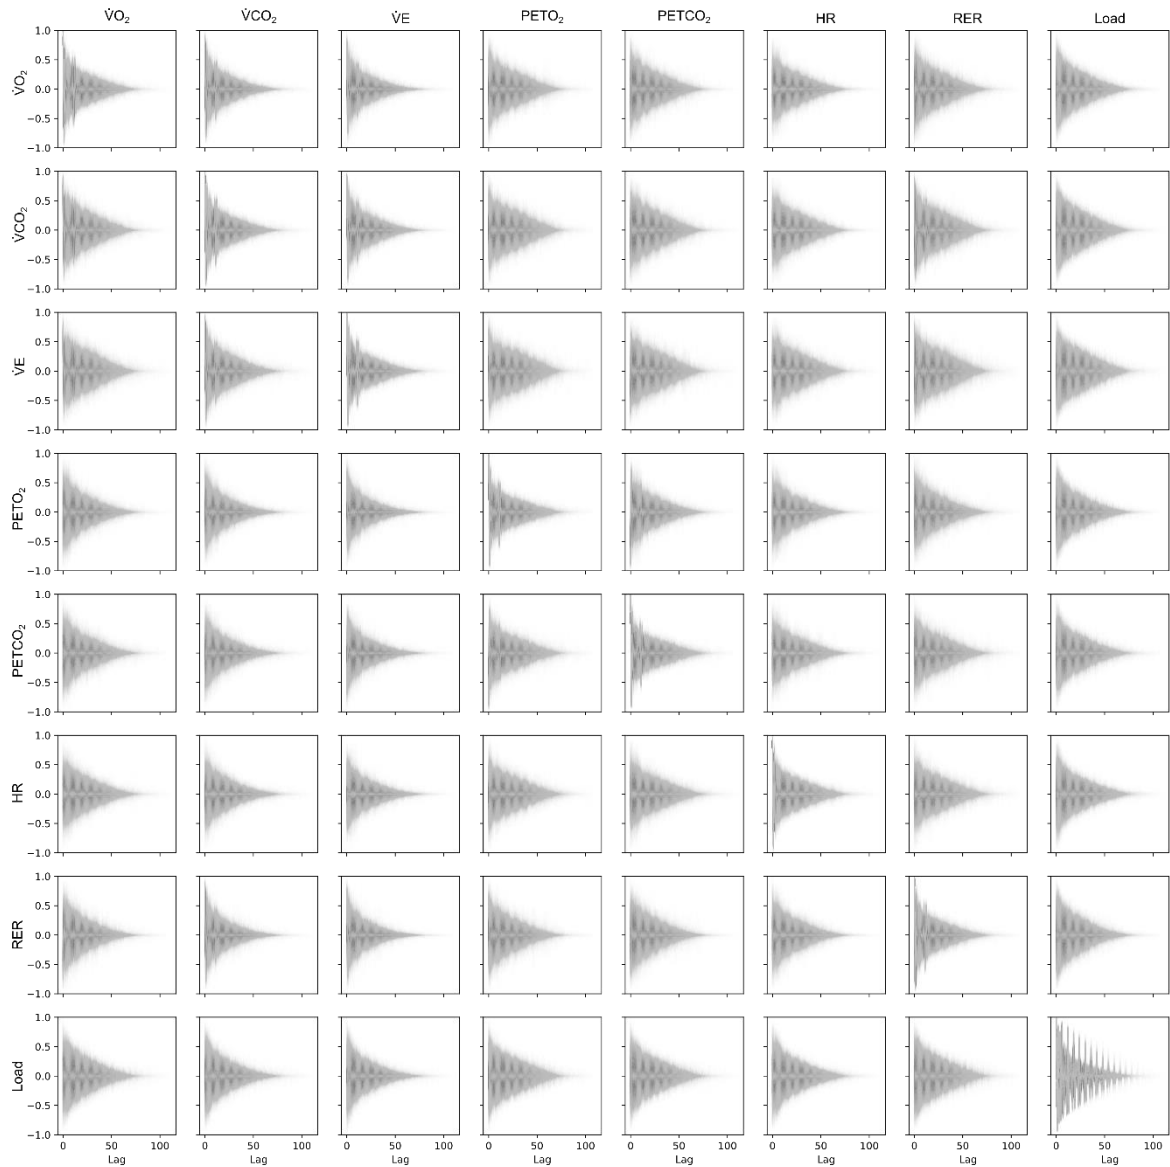

Supplemental Figure S4: Spearman's cross-correlation table for zero temporal lag.  $\dot{V}O_2$  shows strong correlation with  $\dot{V}CO_2$  and  $\dot{V}E$ .

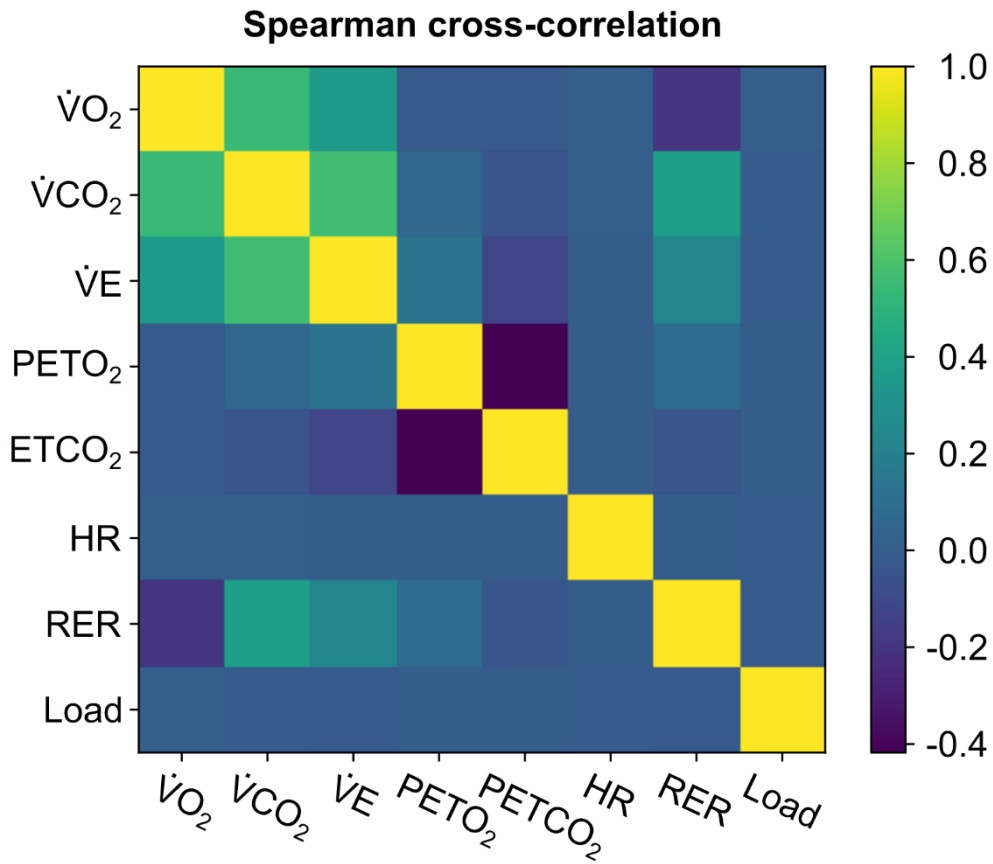

Supplement: mmc1.pdf [file mmc1.pdf]
